# Supplementary material for: The synergistic effect of PMS activation by LaCoO3/g-C3N4 for degradation of tetracycline hydrochloride: performance, mechanism and phytotoxicity evaluation
Source: Royal Society of Chemistry journal article supplement (doi:10.1039/d2nj01848a), 2022-01-01
Supplement: d2nj01848a1.pdf [file d2nj01848a1.pdf]

## Synergistic effect of PMS activation by $\text{LaCoO}_3/\text{g-C}_3\text{N}_4$ for degradation of Tetracycline hydrochloride: performance, mechanism and phytotoxicity evaluation

Xiaoying Yuan, Yue Leng, Changlong Fang, Kangqi Gao, Chenyu Liu, Jianjun Song\*, Yingshu Guo\*

Shandong Provincial Key Laboratory of Molecular Engineering, School of Chemistry and Chemical Engineering, Qilu University of Technology (Shandong Academy of Sciences), Jinan, 250353, P. R. China

Corresponding author:

Yingshu Guo. E-mail: yingshug@126.com

Jianjun Song. E-mail: qlusong@163.com

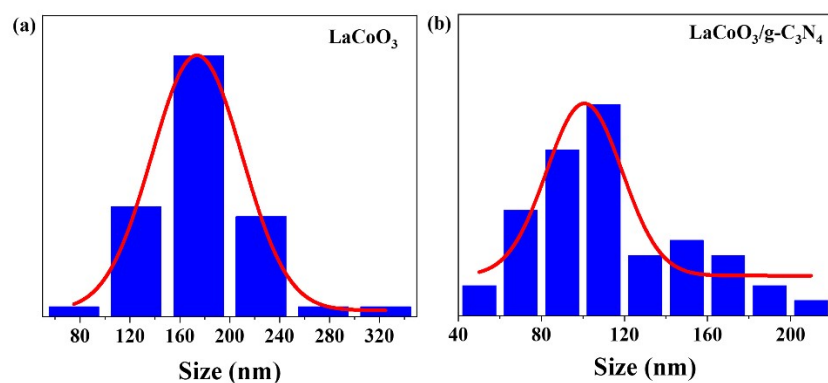

Fig. S1. The particle size distribution of the (a)  $\text{LaCoO}_3$  catalyst, and (b)  $\text{LaCoO}_3/\text{g-C}_3\text{N}_4$  catalyst.

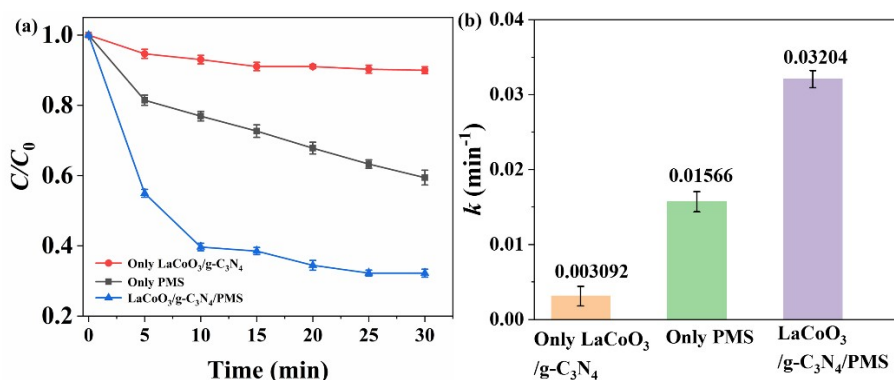

**Fig. S2.** (a) TC degradation by different catalyst (b) and their reaction rate constants ( $k$ ).  
Reaction condition:  $[TC]_0 = 0.02$  g/L,  $[PMS]_0 = 0.1$ g/L,  $[catalyst]_0 = 0.2$  g/L, initial solution pH = 7, T= 25 °C.

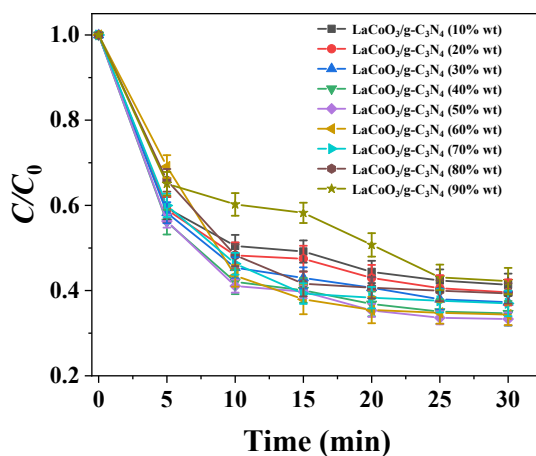

**Fig. S3.** Effect of different account of g-C<sub>3</sub>N<sub>4</sub> on the removal of TC in LaCoO<sub>3</sub>/g-C<sub>3</sub>N<sub>4</sub>/PMS system. Reaction condition:  $[TC]_0 = 0.02$  g/L,  $[PMS]_0 = 0.1$ g/L,  $[catalyst]_0 = 0.2$  g/L, initial solution pH = 7, T= 25 °C.

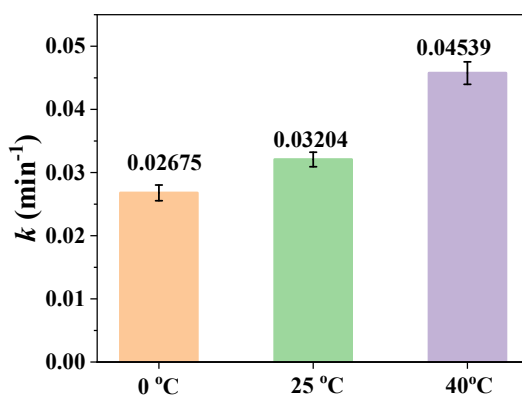

**Fig. S4.** The reaction rate constants of different temperature in LaCoO<sub>3</sub>/g-C<sub>3</sub>N<sub>4</sub>/PMS system. Reaction condition:  $[TC]_0 = 0.02$  g/L,  $[PMS]_0 = 0.1$ g/L,  $[catalyst]_0 = 0.2$  g/L, initial solution pH = 7, T= 25 °C.

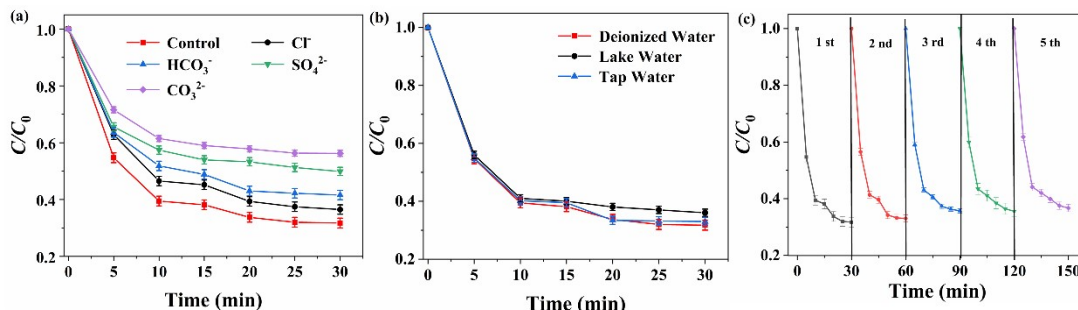

**Fig. S5.** (a) Effect of inorganic anions (10 mM), (b) different water matrices on TC degradation, (c) Recycling test of LaCoO<sub>3</sub>/g-C<sub>3</sub>N<sub>4</sub> catalyst in LaCoO<sub>3</sub>/g-C<sub>3</sub>N<sub>4</sub>/PMS system. Reaction condition:  $[TC]_0 = 0.02$  g/L,  $[PMS]_0 = 0.1$ g/L,  $[catalyst]_0 = 0.2$  g/L, initial solution pH = 7, T= 25 °C.

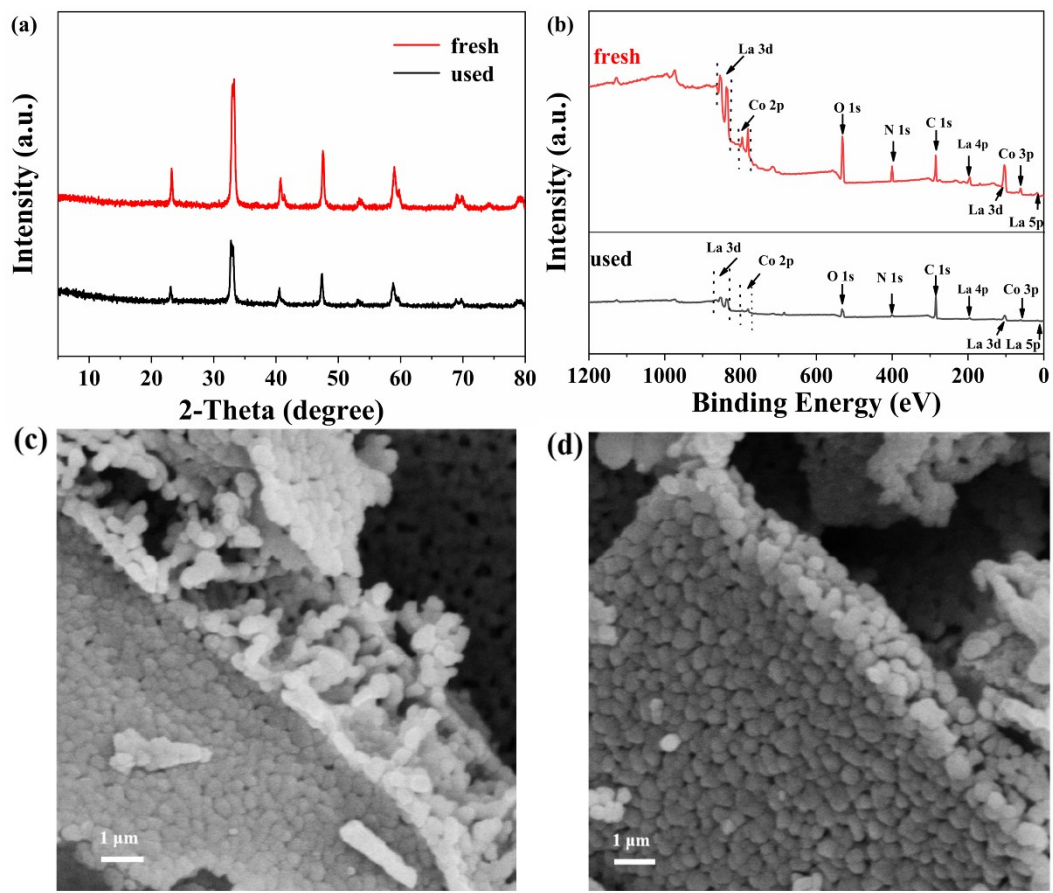

Fig. S6. (a)XRD patterns, (b) XPS spectrum and (c-d) SEM of fresh and used  $\text{LaCoO}_3/\text{g-C}_3\text{N}_4$  composite.

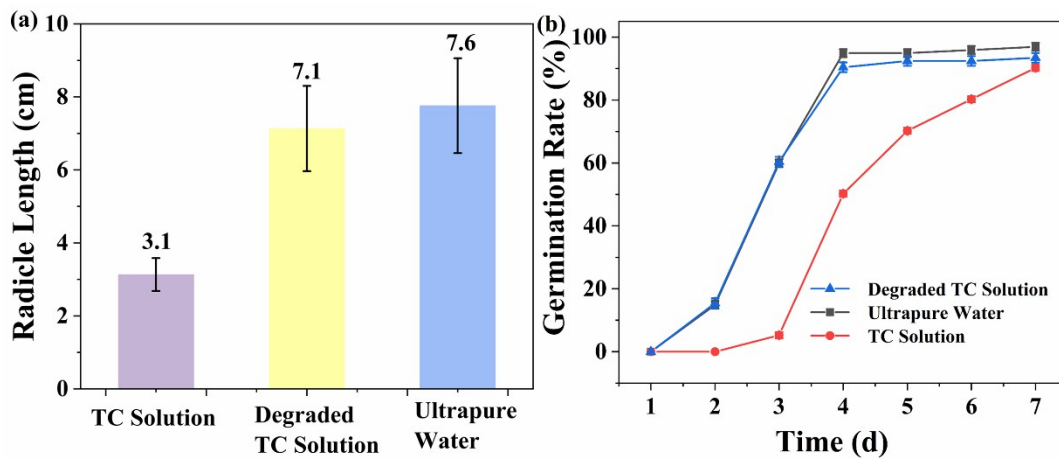

Fig. S7. (a) The average radicle length of mung bean cultivated in TC solution, degraded TC solution and ultrapure water solutions, (b) and the germination rate in TC solution, degraded TC solution and ultrapure water solutions.

Table. S1 The  $k$  of LaCoO<sub>3</sub>/g-C<sub>3</sub>N<sub>4</sub>/PMS system compared with other  $k$ .

| System                                                   | Organic pollutants              | Concentration | $k$ (min <sup>-1</sup> ) | References |
|----------------------------------------------------------|---------------------------------|---------------|--------------------------|------------|
| BiOBr microsphere-S4/Vis                                 | TC (tetracycline hydrochloride) | 10 mg/L       | 0.039                    | [1]        |
| 35%-LFO/BOI/Vis+H <sub>2</sub> O <sub>2</sub>            | TC (tetracycline hydrochloride) | 50 ppm        | 0.04423                  | [2]        |
| g-C <sub>3</sub> N <sub>4</sub> /PS                      | CIP (ciprofloxacin)             | 10 mg/L       | 0.0649                   | [3]        |
| Co-impregnated biochar/PMS                               | ACE (acetaminophen)             | 10 mg/L       | 0.032                    | [4]        |
| LaCoO <sub>3</sub> /g-C <sub>3</sub> N <sub>4</sub> /PMS | TC (tetracycline hydrochloride) | 30 mg/L       | 0.03204                  | our work   |

**references**

- [1] L. Wang, A. Hu, H. Liu, K. Yu, S. Wang, X. Deng, D and Huang, D, Appl. Surf. Sci., 2022, **589**,152902.  
 [2] Z. Cao, Y. Zhao, Z. Zhou, Q. Wang, Q. Mei and H. Cheng, Appl. Surf. Sci., 2022, **590**,153081.  
 [3] H. Zhu, B. Yang, J. Yang, Y. Yuan and J. Zhang, Chemosphere, 2021, **276**, 130217.  
 [4] M.T. Yang, Y. Du, W.C. Tong, A.C.K and Yip, K.A. Lin, Chemosphere, 2019, **226**, 924-933.
